# Supplementary material
Source: publisher figshare collection journal article supplement (https://tandf.figshare.com/ndownloader/files/14661320)
Supplement: Supplementary file 1 [file 14661320]

Supplement 1: LC-MS/MS detection list of 124 compounds.

| **Drug types** | **Compounds (limit of quantitation, ng/mL)** | | |
| --- | --- | --- | --- |
| Cannabis | Δ9-THC1 (1) | 11-Nor-9-carboxy-THC  (0.4) | 11-Nor-Δ9-THC-9-carboxylic acid glucuronide (1) |
| Synthetic Cannabinoid  Receptor Agonists | JWH-0182 (0.1)  JWH-2503 (0.4) | HU-2104 (10) | XLR-115 (0.4) |
| Cocaine | Cocaine (0.4) | Benzoylecgonine (0.4) | Ecognine methyl ester (0.4) |
| Opiates | Morphine (0.4)  Codeine (0.4)  Heroin (0.4) | 6-Acetylmorphine (0.4)  6-Acetylcodeine (0.4) | Morphine-3-β-D-glucuronide (0.1)  Codeine-6-β-D-glucuronide (0.1) |
| Opioids | AH-79216 (0.4)  MT-457 (0.4)  Meperidine (0.4)  Methadone (0.4)  Mitragynine (0.4)  Tramadol (1)  Fentanyl (0.4) | Carfentanyl (0.4)  Acetylfentanyl (0.4)  Butyrfentanyl (0.4)  Isobutyrfentanyl (0.4)  Valerylfentanyl (0.4)  Acryloylfentanyl (0.4)  4-Fluorofentanyl (0.4) | 4-Fluorobutyrfentanyl (0.4)  Cyclopentyl fentanyl (0.4)  Buprenorphine (0.4)  Norbuprenorphine (0.4)  Buprenorphine-3-glucuronide (0.4)  Norbuprenorphine-3-glucuronide (0.4) |
| Amphetamine-type stimulants | Amphetamine (0.4)  MDA7 (0.4)  MDMA8 (0.4)  MDEA9 (0.4) | Methamphetamine (0.4)  Phentermine (10)  Cathinone (0.1)  PMA10 (0.1) | 4-Methoxymethamphetamine (0.4)  4-Methoxyethylamphetamine (0.4)  4-Chloroamphetamine (0.1)  4-Chloromethamphetamine (0.1) |
| Synthetic cathinones | Ethylone (0.4)  Butylone (0.4)  Pentylone (0.4)  Methylone (0.4)  Mephedrone (0.4)  Methedrone (0.4)  MDPV11 (0.4) | α-PPP12 (0.4)  α-PBP13 (0.4)  α-PVP14 (0.4)  α-PHP15 (0.4)  α-PHPP (PV8)16 (0.4)  α-POP (PV9)17 (0.4)  MOPPP18 (0.4) | bk-DMBDB19 (0.4)  4-MEAP20 (0.4)  4-MEC21 (0.4)  4-CEC22 (0.4)  4-CMC23 (0.4) |
| Hallucinogens | Ketamine (0.4)  Norketamine (0.1)  PCP24 (0.4)  TFMPP25 (0.4) | LSD26 (0.4)  2C-C27 (0.1)  2C-B28 (0.1)  2C-I29 (0.1) | 5-MeO-AMT30 (0.4)  5-MeO-DIPT31 (0.4)  5-MeO-MiPT32 (0.4)  AMT33(0.4) |
| Benzodiazepines | Midazolam (0.4)  Phenazepam (0.1)  Clobazam (0.4)  Bromazepam (0.1)  Prazepam (0.4)  Nimetazepam (0.4)  Estazolam (0.1)  Zolpidem (0.4)  Flurazepam (0.4)  Lormetazepam (0.1) | Clonazepam (0.1)  Alprazolam (0.4)  Diazepam (0.1)  Lorazepam (0.1)  Triazolam (0.4)  Flunitrazepam (0.1)  Oxazepam (0.1)  Nitrazepam (0.1)  Temazepam (0.1)  Chlordiazepoxide (0.1) | 7-Aminoclonazepam (0.1)  α-Hydroxyalprazolam (0.1)  Nordiazepam (0.1)  Lorazepam glucuronide (1)  α-Hydroxytriazolam (0.1)  7-Aminoflunitrazepam (0.4)  Oxazepam glucuronide (4)  7-Aminonitrazepam (0.4)  Temazepam glucuronide (4) |
| Other CNS depressants | Phenobarbital (1)  Secobarbital (1) | GHB34 (40)  GBL35 (4) |  |
| Other drugs | Acetaminophen (0.4)  Doxepin (0.4)  Nortriptyline (0.4)  Amitriptyline (0.4) | Imipramine (0.4)  Desipramine (0.4)  Sertraline (0.4)  Dextromethorphan (0.4) | Chlorpheniramine (0.4)  Ephedrine (0.4)  Pseudoephedrine (0.4) |

1THC: Tetrahydrocannabinol; 2 JWH-018: 1-pentyl-3-(1-naphthoyl)indole; 3 JWH-250: 1-pentyl-3-(2-methoxyphenylacetyl)indole; 4HU-210: 1,1-Dimethylheptyl-11-hydroxy- tetrahydrocannabinol; 5XLR-11:5-fluoroUR-144; 6AH-7921: 3,4-dichloro-N-{[1-(dimethylamino)cyclohexyl]methyl}benzamide; 7MDA: 3,4-Methylenedioxyamphetamine; 8 MDMA: 3,4-Methyl​enedioxy​methamphetamine; 9 MDEA: Methyldiethanolamine; 10 PMA: para-Methoxyamphetamine; 11MDPV: Methylenedioxypyrovalerone; 12α-PPP:α-Pyrrolidinopropiophenone; 13α-PBP: α-Pyrrolidinobutiophenone; 14α-PVP:α-Pyrrolidinopentiophenone; 15 α-PHP: α-Pyrrolidinohexiophenone; 16 α-PHPP(PV8): 1-phenyl-2-(1-pyrrolidinyl)-1-heptanone monohydrochloride; 17 α-POP(PV9) 1-Phenyl-2-pyrrolidin-1-yloctan-1-one; 18 MOPPP: 4'-Methoxy-α-pyrrolidinopropiophenone; 19 bk-DMBDB: Dibutylone; 20 4-MEAP: 4-Methyl-α-ethylaminopentiophenone; 21 4-MEC: 4-Methylethcathinone; 22 4-CEC: 4-Chloroethcathinone; 23 4-CMC: 4-Chloromethcathinone;24 PCP: Phencyclidine; 25 TFMPP: 3-Trifluoromethylphenylpiperazine; 26 LSD: Lysergic acid diethylamide; 27 2C-C: 2,5-dimethoxy-4-chlorophenethylamine; 28 2C-B: 2,5-dimethoxy-4-bromophenethylamine; 29 2C-I: 2,5-Dimethoxy-4-iodophenethylamine; 30 5-MeO-AMT: 5-methoxy-α-methyltryptamine; 31 5-MeO-DIPT: 5-methoxy-N,N-diisopropyltryptamine; 32 5-MEO-MiPT: 5-Methoxy-N-methyl-N-isopropyltryptamine; 33 AMT: α-Methyltryptamine; 34 GHB: γ-Hydroxybutyric acid; 35 GBL: γ--Butyrolactone
